# Supplementary material for: Ultra-diffuse hydrothermal venting supports Fe-oxidizing bacteria and massive umber deposition at 5000 m off Hawaii
Source: PubMed Central journal article supplement — ISME J. 2011 May 5;5(11):1748–58. doi: 10.1038/ismej.2011.48 (PMC3197161; doi:10.1038/ismej.2011.48), 2011-05-05
Supplement: ismej201148x1.pdf [file ismej201148x1.pdf]

Supplemental Online Materials

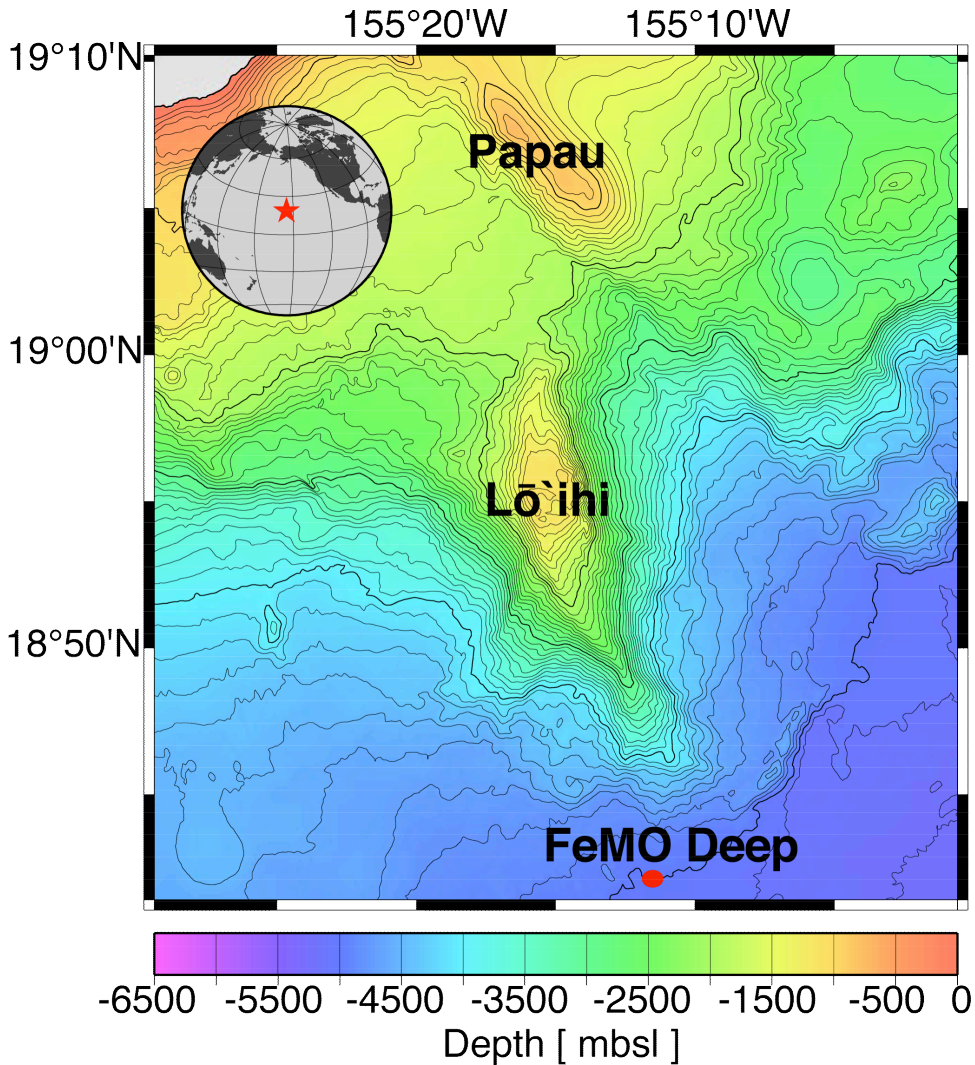

**Figure S1.** Merged bathymetric map of Lō'ihi and the FeMO deep mat field region, Hawaii-Emperor Seamount Trail, Pacific Ocean. Contour interval 100 m; grid size 180 m; Scale = 0.33 °/cm. Map created at Earthref.org, enduring resources for Earth Science Education – <http://earthref.org/cgi-bin/erda.cgi?n=733>. Three distinct sites were sampled within the FeMO Deep field: `Ula Nui, Mound Field, and Moon Mats.

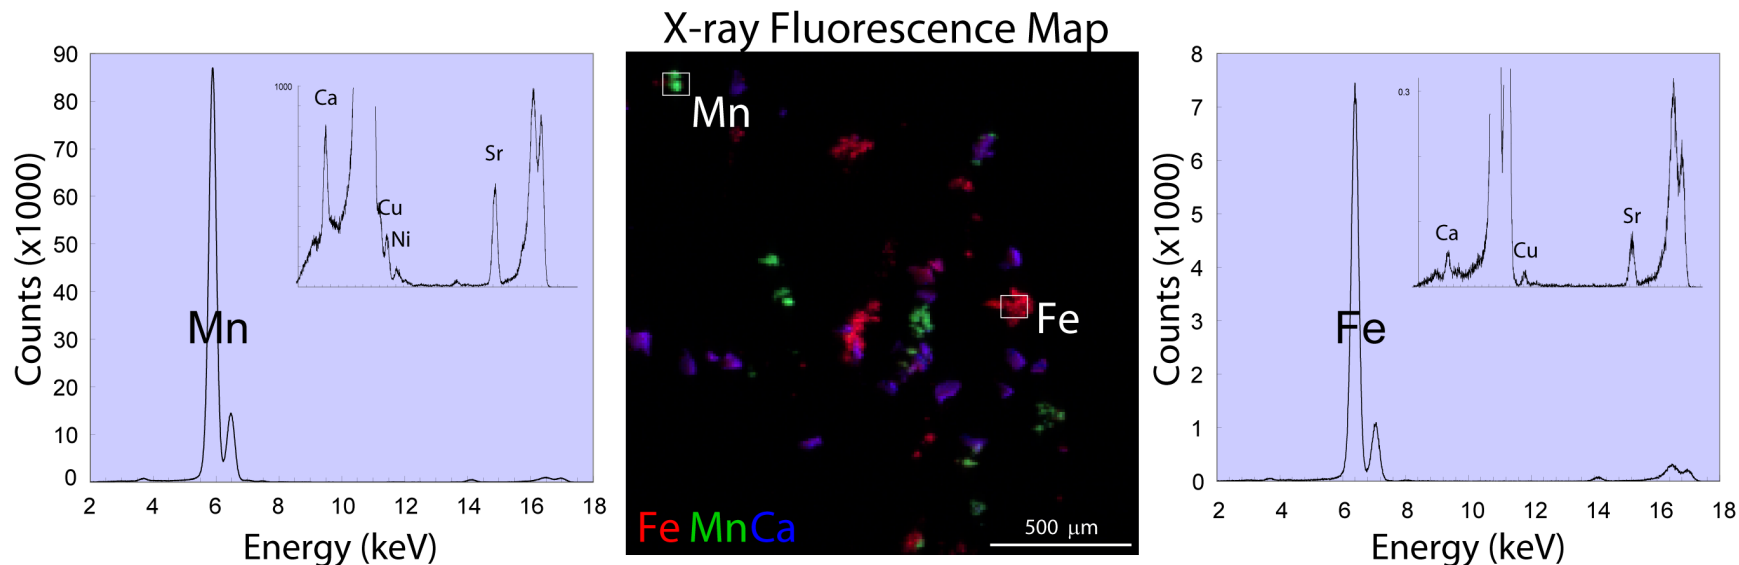

**Figure S2.** A red-green-blue X-ray fluorescence map shows the elemental distribution of Fe, Mn, and Ca in the particles retrieved from the Ula Nui mat (center panel). The red, Fe-rich particles are Fe oxides, the green, Mn-rich particles are Mn oxides, and the purple particles are Ca- and Fe-rich basalt chips. XRF spectra (left and right panels) were collected from a Mn-rich particle (labeled “Mn”) and a Fe-rich particle (labeled “Fe”). For each XRF spectrum, the inset displays a close-up of the low-counts peaks in the spectra. The Mn-rich particle also contains Ca, Cu, Ni, and Sr. The Fe-rich particle contains a similar set of trace elements.

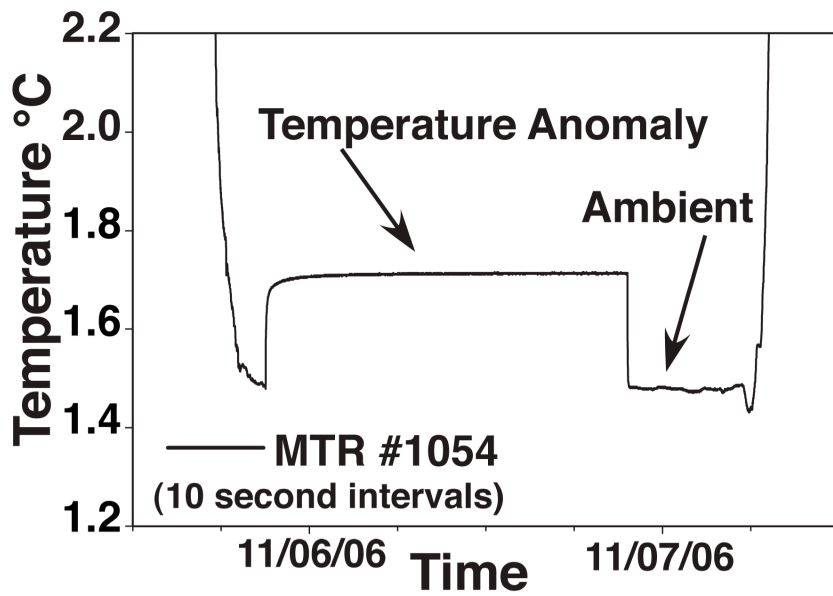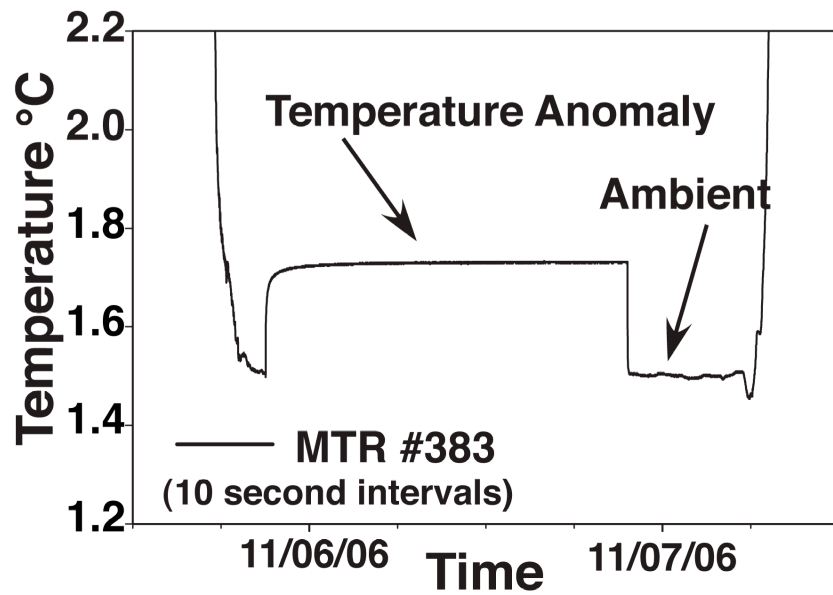

**Figure S3.** Temperature data for `Ula Nui. Continuous temperature loggers (MTR's) were completely submerged in the `Ula Nui mats for ~24 hours. Following collection, several hours of bottom time for other sample collection took place prior to recovery of the ROV Jason.

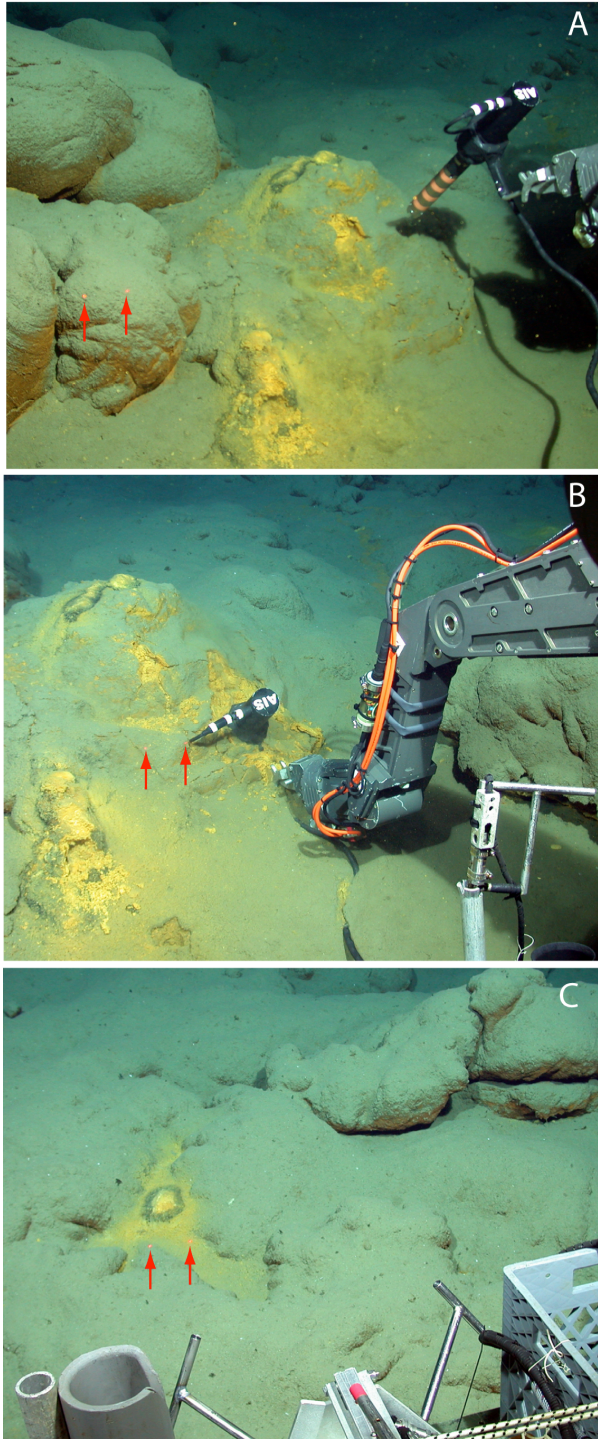

**Figure S4.** Mound Field images. A & B: Electrochemical profiling into a mound of Fe-oxyhydroxides that is adjacent to pillow basalts. Note black Mn oxides at the top of mound. C: “proto-mound” between basalt pillows with cylindrical structure that could be an orifice. Arrows emphasize laser spots that indicate 10 cm scale.



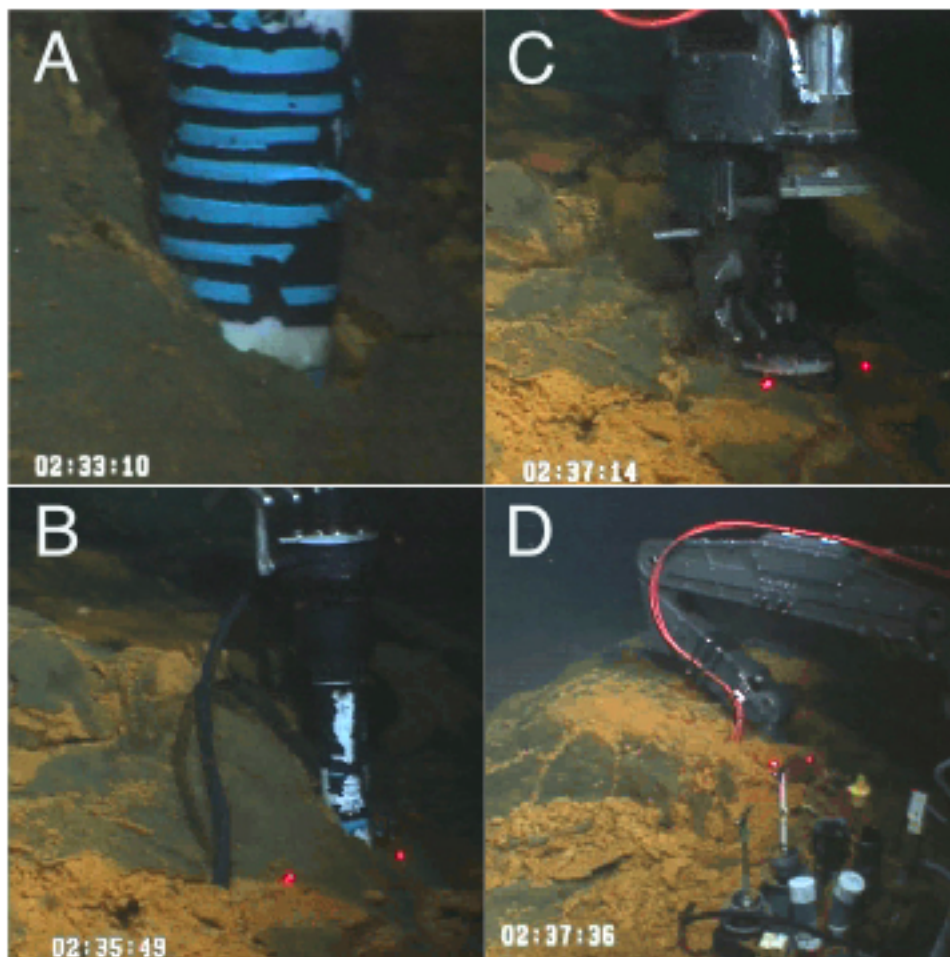

**Figure S5.** Mat Chemistry. A-D still images from the ROV *Jason II* showing consecutive profile measurements into `Ula Nui (see Movie S1 for complete time series of measurements and sampling of this mat). Laser dots are 10 cm apart.

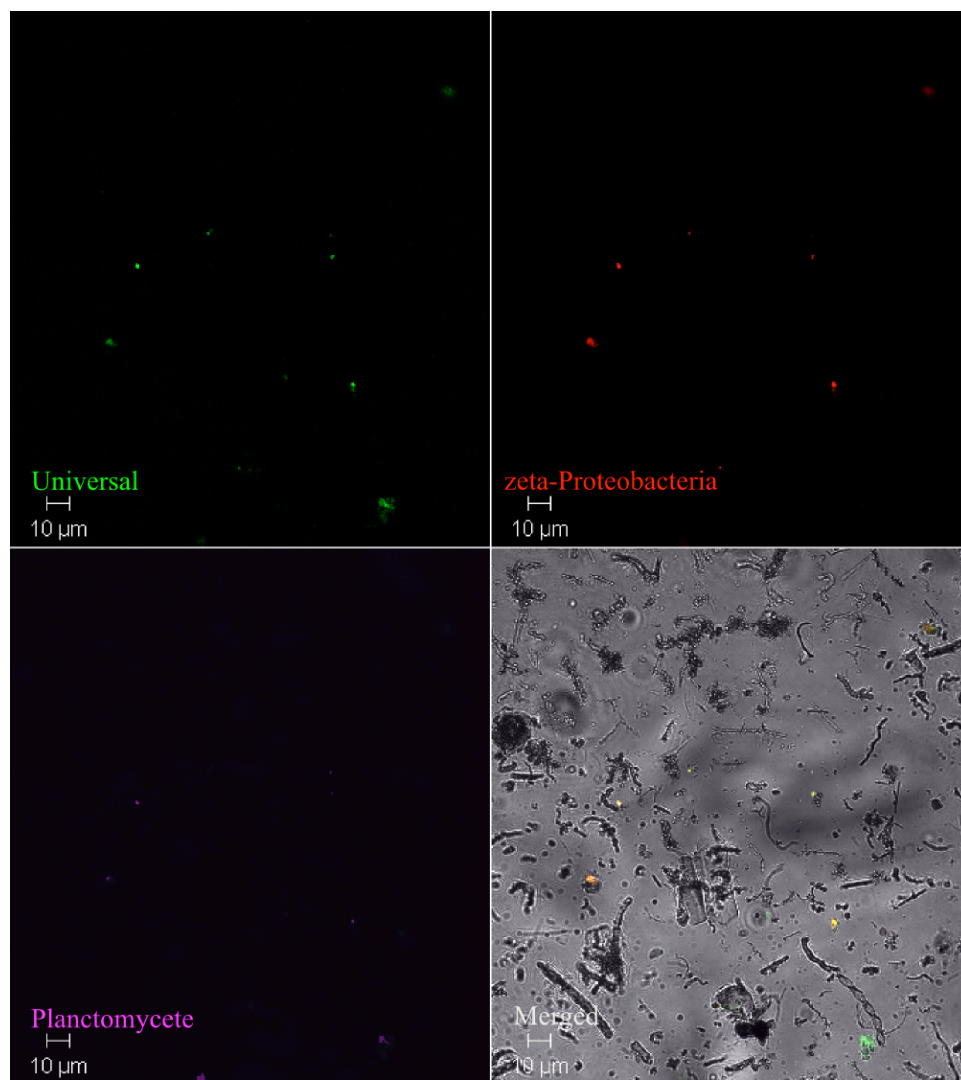

**Figure S6.** Fluorescent in situ hybridization images of 'Ula nui mat materials. A: hybridization with a Bacterial group-specific probe (Univ-1390). B: same field of view as A, showing cells that hybridize with a *Zetaproteobacteria*-specific probe (Zeta-672). C: 'Ula nui-specific *Planctomycetes* probe hybridization (Plancto-313) for same field of view. D: Merged fluorescent and unfiltered image showing hybridized cells with Fe-oxyhydroxide and Mn-oxide material.
